# Supplementary material
Source: PubMed Central journal article supplement (PMC3885182)
Supplement: NIHMS534276-supplement-01.pdf [file NIHMS534276-supplement-01.pdf]

A

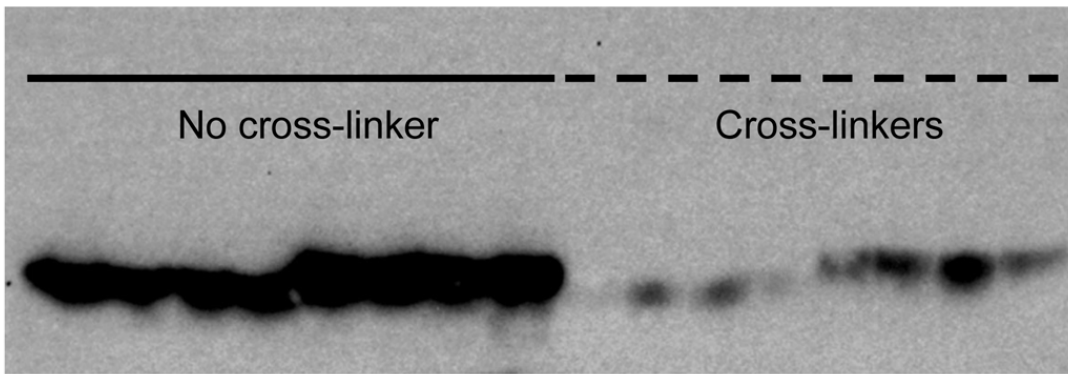

B

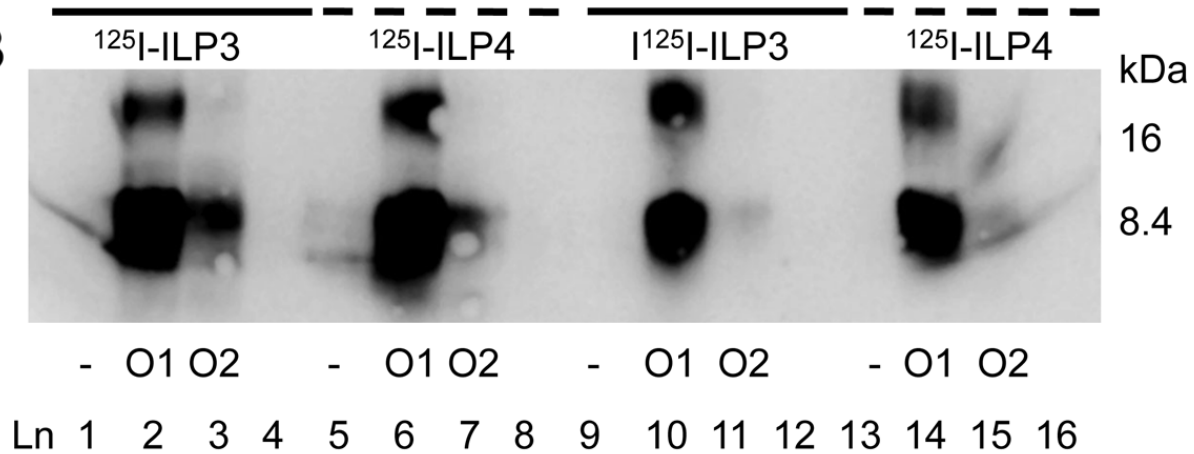

**Supplemental Fig. 1.** Results for a cross-linking experiment showing that rOEH does not interact with synthetic *Ae. aegypti* ILP3 or ILP4 after overnight binding. Assays were performed as described in the Materials and Methods. <sup>125</sup>I-ILPs (20,000 cpm/80 μl total volume) were incubated alone (-) in saline overnight at 4° C or with one of two semipurified preparations of rOEH (O1 and O2, 1 μg). The volume in each tube was split between two tubes, and no crosslinker was added to one set. To the other set of tubes, freshly prepared cross-linking reagents were added and incubated for 1 h at 4° C. Aliquots of the samples (15 μl mixed with Tris-tricine sample buffer) were electrophoresed and blotted. The blot was first probed with the OEH antibody and then the dry blot was covered with X-ray film. (A) Autoradiograph showing the presence of <sup>125</sup>I-ILPs (ILP3, 5849 kDa; ILP4, 6064 kDa) in the

samples with no cross-linker (Lanes (Ln) 1-8) while less of  $^{125}\text{I}$ -ILP is detectable in the cross-linked samples (Ln 9-16). However, rIOEH had no interaction with the  $^{125}\text{I}$ -ILPs, because no higher molecular weight bands (>15 kDa) were visible in the cross-linked samples. (B) Immunoblot of the same sample after probing with the OEH antibody. Anti-OEH readily detected rIOEHs (O1) in the non-crosslinked (lanes 1-8) and crosslinked treatments but no size shift in the cross-linked treatments was observed.
